# Supplementary material for: Eradication of hepatitis C virus is associated with the attenuation of steatosis as evaluated using a controlled attenuation parameter
Source: PubMed Central journal article supplement (PMC5959884; doi:10.1038/s41598-018-26293-9), 2018-05-18
Supplement: 41598_2018_26293_MOESM1_ESM.pdf [file 41598_2018_26293_MOESM1_ESM.pdf]

Eradication of hepatitis C virus is associated with the attenuation of steatosis as evaluated using a controlled attenuation parameter

Kohei Shimizu<sup>1\*</sup>, Yoko Soroida<sup>1\*</sup>, Masaya Sato<sup>1,2</sup>, Hiromi Hikita<sup>1</sup>, Tamaki Kobayashi<sup>1</sup>, Momoe Endo<sup>1</sup>, Mamiko Sato<sup>1</sup>, Hiroaki Gotoh<sup>1</sup>, Tomomi Iwai<sup>1</sup>, Ryosuke Tateishi<sup>2</sup>, Kazuhiko Koike<sup>2</sup>, Yutaka Yatomi<sup>1</sup> and Hitoshi Ikeda<sup>1,2</sup>.

<sup>1</sup>Department of Clinical Laboratory Medicine, and <sup>2</sup>Department of Gastroenterology, Graduate School of Medicine, The University of Tokyo.

\*These authors equally contributed to this study.

## **Running Head**

Hepatic steatosis alteration after HCV eradication

## **Corresponding Author:**

Masaya Sato, M.D., Ph.D.

Department of Clinical Laboratory Medicine,

Graduate School of Medicine, The University of Tokyo

7-3-1 Hongo, Bunkyo-ku, Tokyo 113-8655, Japan

Tel +81-3-3815-5411

FAX + 81-3-3814-0021

e-mail: [masayasato0407@gmail.com](mailto:masayasato0407@gmail.com)

Word count (Text): 1727 words

Tables: 3

Figure: 1

Conflict of interest

None of the authors have any conflicts of interest

**Supplementary Table 1. Baseline clinical parameters in patients with and those without improved (decreased) LDL level**

| Parameters                                   | Values           |                  | <i>P</i> - value |
|----------------------------------------------|------------------|------------------|------------------|
|                                              | Decreased        | Increased        |                  |
| age                                          | 49 (31-49)       | 68 (55-72)       | 0.492            |
| Body mass index                              | 26.1 (20.7-26.1) | 22.9 (21.4-25.1) | 0.696            |
| HCV RNA (LogIU/mL)                           | 6.9 (6.9-6.9)    | 6.3 (5.6-6.5)    | <0.001           |
| LSM (kPa)                                    | 16.4 (11.8-16.4) | 7.5(5.4-11.6)    | 0.356            |
| CAP (dB/m)                                   | 268 (264-268)    | 295 (257-330)    | 0.019            |
| AST (U/L)                                    | 78 (73-78)       | 38.5 (29-54)     | 0.014            |
| ALT (U/L)                                    | 79 (74-79)       | 33 (26-61)       | 0.057            |
| $\gamma$ -GTP (U/L)                          | 81 (36-81)       | 29 (18-51)       | 0.132            |
| Platelet Count ( $\times 10^4/\mu\text{L}$ ) | 19.1 (8.3-19.1)  | 18.3 (12.4-20.4) | 0.800            |
| Albumin (g/dL)                               | 4.0 (3.8-4.0)    | 4.2 (3.8-4.5)    | 0.520            |
| Total Cholesterol (mg/dL)                    | 172 (166-172)    | 180 (147-200)    | 0.979            |
| HDL Cholesterol (mg/dL)                      | 55 (48-55)       | 53 (47-67)       | 0.787            |
| LDL Cholesterol (mg/dL)                      | 93 (92-93)       | 107 (77-129)     | 0.679            |
| HbA1c                                        | 7.1 (7.1-7.1)    | 6.1 (5.5-7.1)    | 0.653            |

\*Data were expressed as the median values (1<sup>st</sup>-3<sup>rd</sup> quartiles).

**Supplementary Table 2. Baseline clinical parameters in patients with and those without improved (increased) HDL level**

| Parameters                                   | Values           |                  | <i>P</i> - value |
|----------------------------------------------|------------------|------------------|------------------|
|                                              | Decreased        | Increased        |                  |
| age                                          | 68.5 (64-75)     | 65 (61-73)       | 0.434            |
| Body mass index                              | 22.8 (20.6-26.7) | 22.2 (20.8-24.3) | 0.396            |
| HCV RNA (LogIU/mL)                           | 6.2 (5.4-6.5)    | 6.5 (5.3-11.9)   | 0.760            |
| LSM (kPa)                                    | 12.7 (8.6-22.0)  | 6.5 (5.3-11.9)   | 0.039            |
| CAP (dB/m)                                   | 284 (262-315)    | 273 (256-307)    | 0.720            |
| AST (U/L)                                    | 60 (26-73)       | 37 (30-50)       | 0.299            |
| ALT (U/L)                                    | 59 (24-83)       | 35 (29-56)       | 0.260            |
| $\gamma$ -GTP (U/L)                          | 33 (25-112)      | 23 (17-42)       | 0.068            |
| Platelet Count ( $\times 10^4/\mu\text{L}$ ) | 18.1 (10.6-22.3) | 17.4 (12.8-23.0) | 0.976            |
| Albumin (g/dL)                               | 4.2 (3.8-4.6)    | 4.3 (3.9-4.4)    | 0.866            |
| Total Cholesterol (mg/dL)                    | 158 (119-158)    | 156 (147-201)    | 0.432            |
| HDL Cholesterol (mg/dL)                      | 60 (53-69)       | 55 (45-66)       | 0.308            |
| LDL Cholesterol (mg/dL)                      | 99 (59-127)      | 103 (81-137)     | 0.488            |
| HbA1c                                        | 6.4 (5.5-6.4)    | 6.7 (5.5-7.6)    | 0.746            |

\*Data were expressed as the median values (1<sup>st</sup>-3<sup>rd</sup> quartiles).
